# Supplementary material for: Association of Tumor Necrosis Factor Inhibitors with the Risk of Nontuberculous Mycobacterial Infection in Patients with Rheumatoid Arthritis: A Nationwide Cohort Study
Source: MDPI journal article supplement (doi:10.3390/jcm12226998), 2023-11-09
Supplement: s1 [file s1]

**Table S1.** Detailed operational definitions of each comorbid disease.

| Comorbid disease                             | Operational definition                                                                                                                                                                                                                                                                                                                                                                      |
|----------------------------------------------|---------------------------------------------------------------------------------------------------------------------------------------------------------------------------------------------------------------------------------------------------------------------------------------------------------------------------------------------------------------------------------------------|
| Diabetes mellitus                            | Diagnostic code (diabetic mellitus E10.*-E14.*) and antidiabetic medication prescription code                                                                                                                                                                                                                                                                                               |
| Chronic liver disease                        | Diagnostic code (acute hepatitis B15.*, B16.*, viral hepatitis B17.*-B19.*, alcoholic liver disease K70.*, chronic hepatitis K73.*, fibrosis and cirrhosis of liver K74.*)                                                                                                                                                                                                                  |
| Lung disease                                 | Diagnostic code (emphysema J43.*, chronic obstructive pulmonary disease J44.*, except MacLeod's syndrome J430) and prescription code for methylxanthine or inhaler in patients who are 40 years and older<br>Diagnostic code (pulmonary aspergillosis B44.*, cystic fibrosis E84.*, pneumonia J12.0*-J18.*, asthma J45.*-J46.*, bronchiectasis J47.*, interstitial pulmonary disease J84.*) |
| Gastroesophageal reflux disease              | Diagnostic code (gastro-esophageal reflux disease K21.*) and proton-pump inhibitor prescription for more than 14 days                                                                                                                                                                                                                                                                       |
| Cancer                                       | Diagnostic code (malignant neoplasm C00.*-C97.*) and cancer treatment history (chemotherapy, radiotherapy, surgery)                                                                                                                                                                                                                                                                         |
| Human immunodeficiency virus (HIV) infection | Diagnostic code (human immunodeficiency virus disease B20.*-B24.*)                                                                                                                                                                                                                                                                                                                          |
| Solid organ transplantation                  | Diagnostic code (solid organ transplantation Z94.*)                                                                                                                                                                                                                                                                                                                                         |
| Tuberculosis history                         | More than two diagnostic code (tuberculosis A15.*-A19.*, U84.*) and more than three prescription code for tuberculosis treatment medication                                                                                                                                                                                                                                                 |

**Table S2.** Baseline characteristics of unmatched cohort.

| Variables                                                     | Unmatched cohort |                     |        |
|---------------------------------------------------------------|------------------|---------------------|--------|
|                                                               | TNFi<br>n=3269   | csDMARD<br>n=20,694 | SMD    |
| Female gender                                                 | 2287 (69.9)      | 15,088 (72.9)       | 0.065  |
| Age (years)                                                   | 50.4 ± 14.00     | 57.2 ± 14.20        | 0.486  |
| Comorbidities*                                                |                  |                     |        |
| Diabetes                                                      | 322 (9.8)        | 2877 (13.9)         | -0.125 |
| CLD                                                           | 565 (17.2)       | 3451 (16.6)         | 0.016  |
| LD                                                            | 637 (19.4)       | 5355 (25.8)         | -0.153 |
| GERD                                                          | 949 (29.0)       | 2745 (13.2)         | 0.393  |
| ISD                                                           | 0 (0)            | 907 (4.3)           | -0.302 |
| hTB                                                           | 61 (1.8)         | 331 (1.5)           | 0.020  |
| Number of comorbid diseases                                   |                  |                     | 0.018  |
| 0                                                             | 1489 (45.5)      | 9869 (47.6)         |        |
| 1                                                             | 1187 (36.3)      | 7273 (35.1)         |        |
| 2 or more                                                     | 593 (18.1)       | 3552 (17.1)         |        |
| Charlson comorbidity index score                              |                  |                     | -      |
| 1                                                             | 855 (26.1)       | 4511 (21.7)         |        |
| 2                                                             | 947 (28.9)       | 5069 (24.4)         |        |
| 3 or more                                                     | 1467 (44.8)      | 11,114 (53.7)       |        |
| Duration of csDMARDs treatment before the index date (months) | 33.8 ± 29.79     | -                   | -      |
| TNFi treatment**                                              |                  |                     |        |
| Adalimumab                                                    | 1567 (47.9)      | -                   |        |
| Etanercept                                                    | 1259 (38.5)      | -                   |        |
| Golimumab                                                     | 399 (12.2)       | -                   |        |
| Infliximab                                                    | 669 (20.4)       | -                   |        |
| Duration of TNFi treatment (months)                           | 37.6 ± 25.15     | -                   |        |
| PDC of TNFi                                                   | 0.98 ± 0.043     | -                   |        |
| csDMARDs treatment**                                          |                  |                     |        |
| Methotrexate                                                  | 2968 (90.7)      | 15,705 (75.8)       |        |
| Hydroxychloriquine                                            | 2526 (77.2)      | 17,191 (83.0)       |        |
| Sulfasalazine                                                 | 2344 (71.7)      | 10,103 (48.8)       |        |
| Leflunomide                                                   | 1740 (53.2)      | 7364 (35.5)         |        |
| Number of csDMARDs                                            | 3.6 ± 1.41       | 3.1 ± 1.35          |        |
| Duration of csDMARDs (months)                                 | 38.5 ± 26.84     | 50.4 ± 35.63        |        |
| PDC of csDMARDs                                               | 0.85 ± 0.311     | 0.71 ± 0.309        |        |
| Anti-inflammatory treatment**                                 |                  |                     |        |
| PDC of oral corticosteroid                                    | 0.73 ± 0.359     | 0.56 ± 0.354        |        |
| PDC of NSAIDs                                                 | 0.85 ± 0.264     | 0.62 ± 0.341        |        |
| Type of institution                                           |                  |                     | -      |
| Tertiary hospital                                             | 3004 (91.8)      | 14,147 (68.3)       |        |
| General hospital                                              | 176 (5.3)        | 2487 (12.0)         |        |
| Community hospital/<br>clinics/others                         | 89 (2.7)         | 4060 (19.6)         |        |
| Income levels***                                              |                  |                     | -      |
| High                                                          | 921 (28.1)       | 6144 (29.6)         |        |
| Intermediate                                                  | 1319 (40.3)      | 8411 (40.6)         |        |
| Low                                                           | 1029 (31.4)      | 6139 (29.6)         |        |

Values are represented as frequency (percent) or mean ± standard deviation; \* Comorbidities and the Charlson comorbidity index scores were determined during one-year period prior to index date; \*\* RA treatments were

---

determined from the study index date to the end of follow-up; \*\*\* Income levels were categorized according to patient's individual NHI premium quintile and occupation data provided in the NHIS database; TNFi, tumor necrosis factor inhibitors; csDMARD, conventional synthetic disease-modifying anti-rheumatic drugs; SMD, standardized mean difference; CLD, chronic liver disease; LD, lung disease; GERD, gastroesophageal reflux disease; ISD, immunosuppressive disease; hTB, history of tuberculosis infection; PDC, proportion of days covered; NSAIDs, non-steroidal anti-inflammatory drugs.

**Table S3.** Incidence rates of nontuberculous mycobacteria (NTM) infection on unmatched cohort.

|                            | Unmatched cohort |         |
|----------------------------|------------------|---------|
|                            | TNFi             | csDMARD |
| NTM infection event number | 35               | 438     |
| IR (1000 person years)     | 2.77             | 3.39    |

TNFi, tumor necrosis factor inhibitors; csDMARD, conventional synthetic disease-modifying anti-rheumatic drugs; NTM, nontuberculous mycobacteria; IR, incidence rate.

**Table S4.** Adjusted hazard ratio for nontuberculous mycobacteria (NTM) infection on unmatched cohort.

| Variables                                                                | Unmatched cohort |        |       |         |
|--------------------------------------------------------------------------|------------------|--------|-------|---------|
|                                                                          | aHR              | 95% CI |       | p-value |
| TNFi treatment                                                           | 0.893            | 0.525  | 1.518 | 0.675   |
| Age (years)                                                              | 1.223            | 1.133  | 1.320 | <0.001  |
| Male gender                                                              | 1.266            | 1.039  | 1.543 | 0.020   |
| Comorbidities*                                                           |                  |        |       |         |
| Diabetes                                                                 | 0.638            | 0.474  | 0.860 | 0.003   |
| CLD                                                                      | 1.094            | 0.863  | 1.388 | 0.457   |
| LD                                                                       | 2.221            | 1.825  | 2.702 | <0.001  |
| GERD                                                                     | 1.159            | 0.888  | 1.514 | 0.277   |
| ISD                                                                      | 1.395            | 0.813  | 2.394 | 0.226   |
| hTB                                                                      | 3.362            | 2.269  | 4.983 | <0.001  |
| Charlson comorbidity index score                                         | 1.122            | 0.975  | 1.292 | 0.108   |
| Duration from the initial csDMARDs start date to the index date (months) | 0.999            | 0.986  | 1.012 | 0.892   |
| RA treatments                                                            |                  |        |       |         |
| Number of csDMARDs                                                       | 1.139            | 1.053  | 1.234 | 0.001   |
| PDC of csDMARDs                                                          | 1.038            | 0.679  | 1.589 | 0.862   |
| PDC of oral corticosteroid                                               | 2.197            | 1.509  | 3.199 | <0.001  |
| PDC of NSAIDs                                                            | 0.953            | 0.694  | 1.309 | 0.767   |
| Income levels                                                            |                  |        |       |         |
| High vs. low                                                             | 1.423            | 1.116  | 1.813 | 0.004   |
| Intermediate vs. low                                                     | 1.181            | 0.933  | 1.495 | 0.167   |

aHR, adjusted hazard ratio; CI, confidence interval; TNFi, tumor necrosis factor inhibitors; CLD, chronic liver disease; LD, lung disease; GERD, gastroesophageal reflux disease; ISD, immunosuppressive disease; hTB, history of tuberculosis infection; csDMARDs, conventional synthetic disease-modifying anti-rheumatic drugs; RA, rheumatoid arthritis; PDC, proportion of days covered; NSAIDs, non-steroidal anti-inflammatory drugs.
